# Supplementary material for: Cationic complex directed thiostannate layers with excellent proton conduction and photocatalytic properties
Source: Royal Society of Chemistry journal article supplement (doi:10.1039/d2ce00043a), 2022-01-01
Supplement: d2ce00043a1.pdf [file d2ce00043a1.pdf]

## *Supporting Information*

### **Cationic complex directed thiostannate layers with excellent proton conduction and photocatalysis properties**

Kai-Li Liu<sup>a,b</sup>, Ming-Bu Luo<sup>a</sup>, Xuechou Zhou<sup>c</sup> and Qipu Lin<sup>\*a</sup>

- a. State Key Laboratory of Structural Chemistry, Fujian Institute of Research on the Structure of Matter, Chinese Academy of Sciences, Fuzhou, Fujian 350002, China.*
- b. University of Chinese Academy of Sciences, Beijing 100049, China.*
- c. School of Life Sciences, Fujian Agriculture and Forestry University, Fuzhou 350002, China.*

*E-mail: [linqipu@fjirsm.ac.cn](mailto:linqipu@fjirsm.ac.cn)*

## **Table of contents**

**Section S1:** Chemical stability

**Section S2:** Thermogravimetric analysis (TGA)

**Section S3:** UV-Vis absorption spectra

**Section S4:** Mott-Schottky plots

**Section S5:** Energy dispersive spectroscopy (EDS)

**Section S6:** Proton conduction

**Section S7:** Photodegradation

**Section S8:** Powder X-ray Diffraction (PXRD)

**Section S9:** X-ray photoelectron spectroscopy (XPS)

## Section S1: Chemical stability

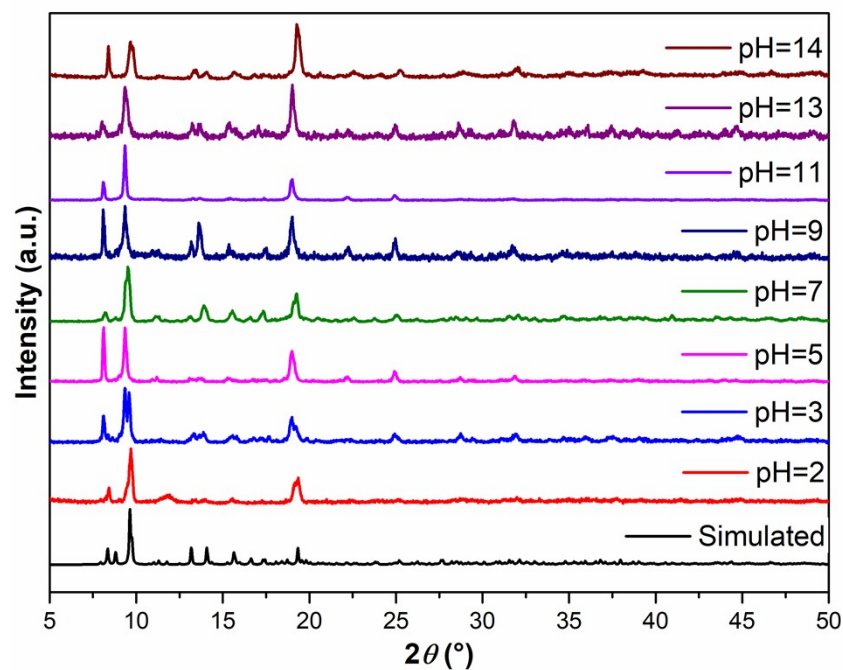

**Fig. S1** The XRD patterns of SnS-Fe after immersion in aqueous solution with pH 2-14 for 3 d.

## Section S2: Thermogravimetric analysis (TGA)

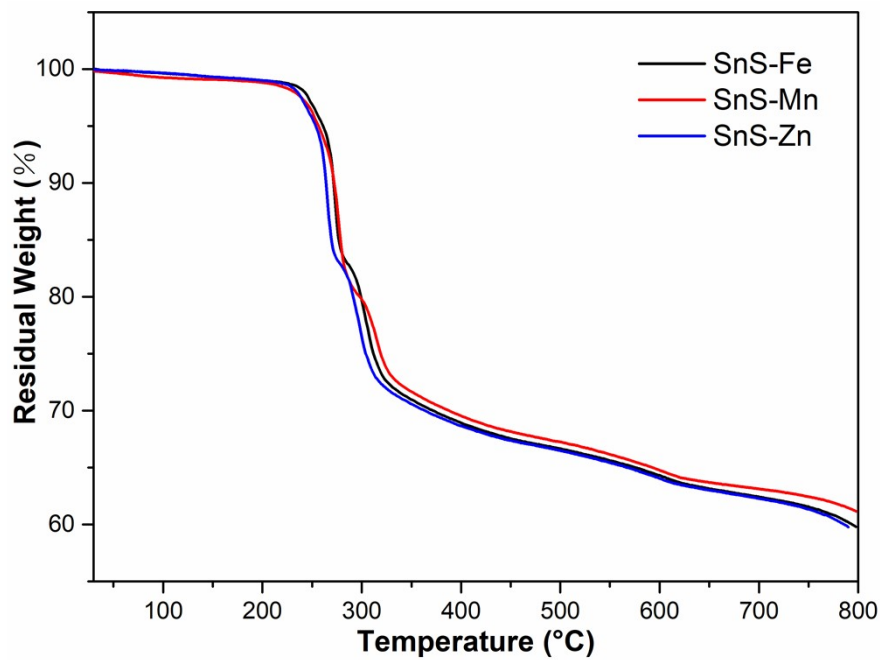

**Fig. S2** The TGA curves of SnS-M (M = Fe, Mn and Zn).

### Section S3: UV-Vis absorption spectra

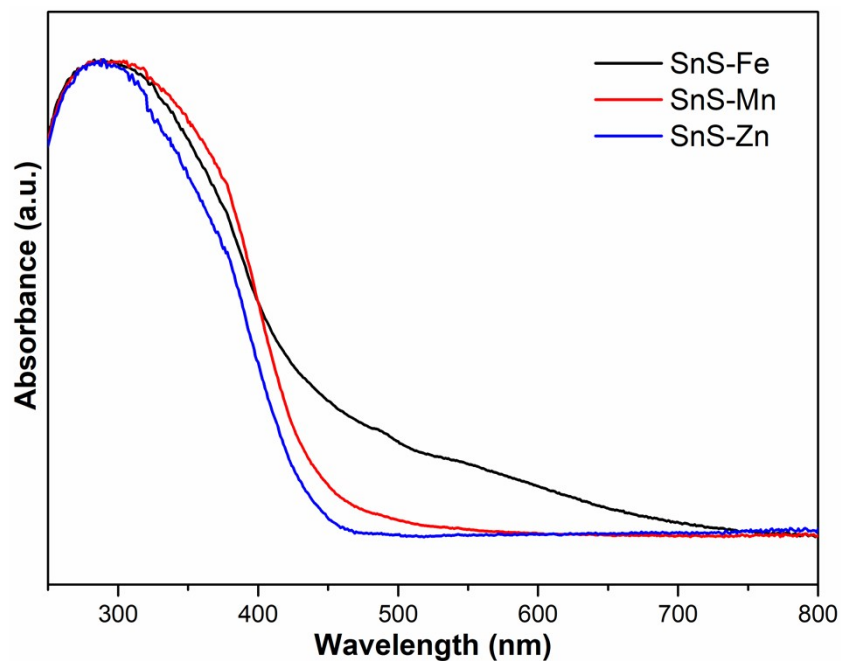

Fig. S3 The UV-Vis absorption spectra of SnS-M (M = Fe, Mn and Zn)

### Section S4: Mott-Schottky plots

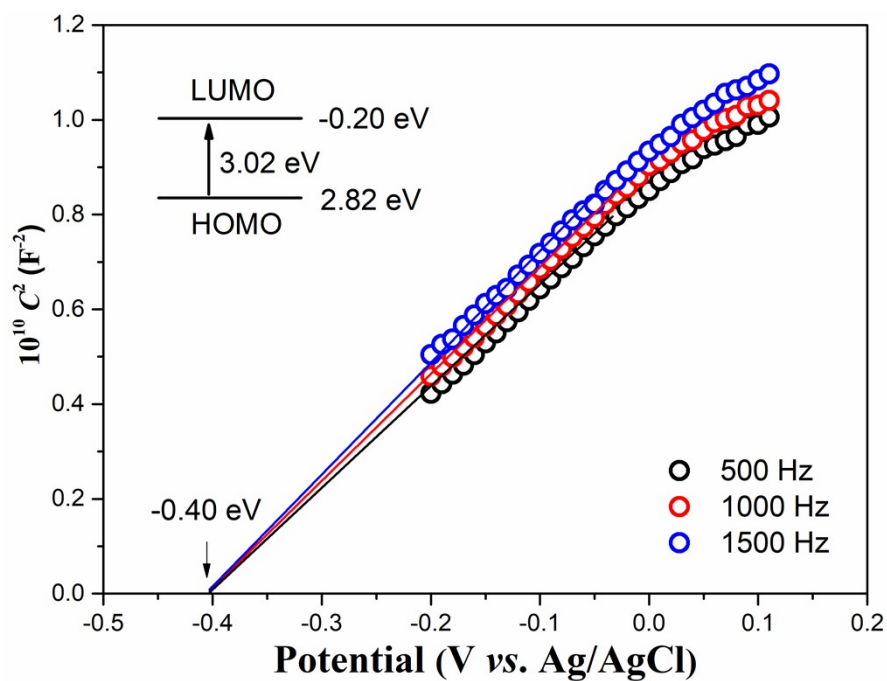

Fig. S4 The Mott-Schottky plots of SnS-Zn in 0.2 M Na<sub>2</sub>SO<sub>4</sub> solution.

**Section S5:** Energy dispersive spectroscopy (EDS)

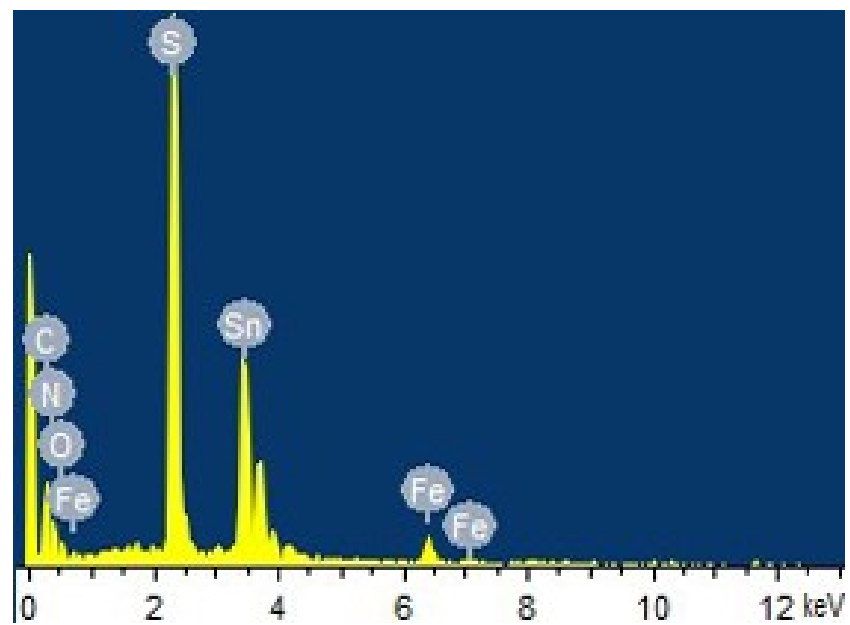

**Fig. S5** The EDS plot of SnS-Fe.

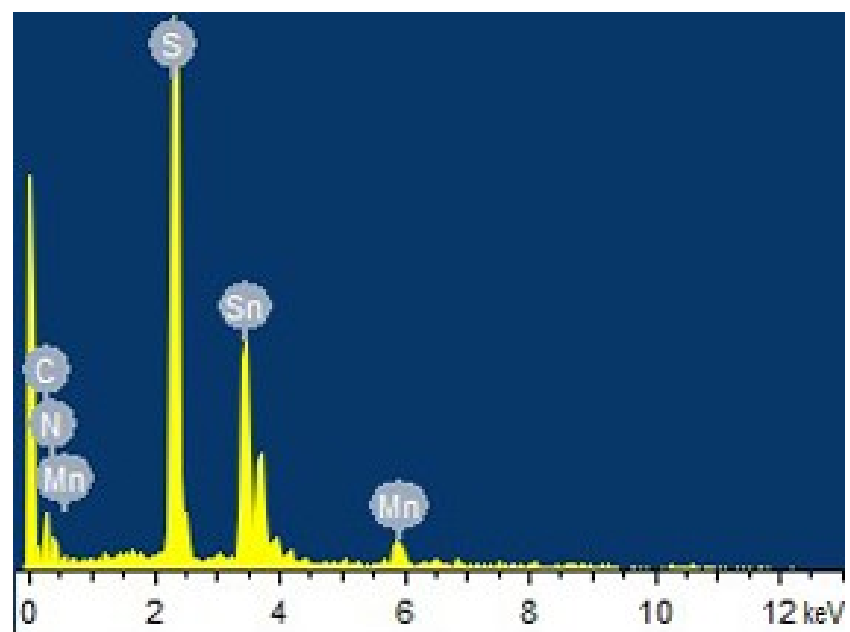

**Fig. S6** The EDS plot of SnS-Mn.

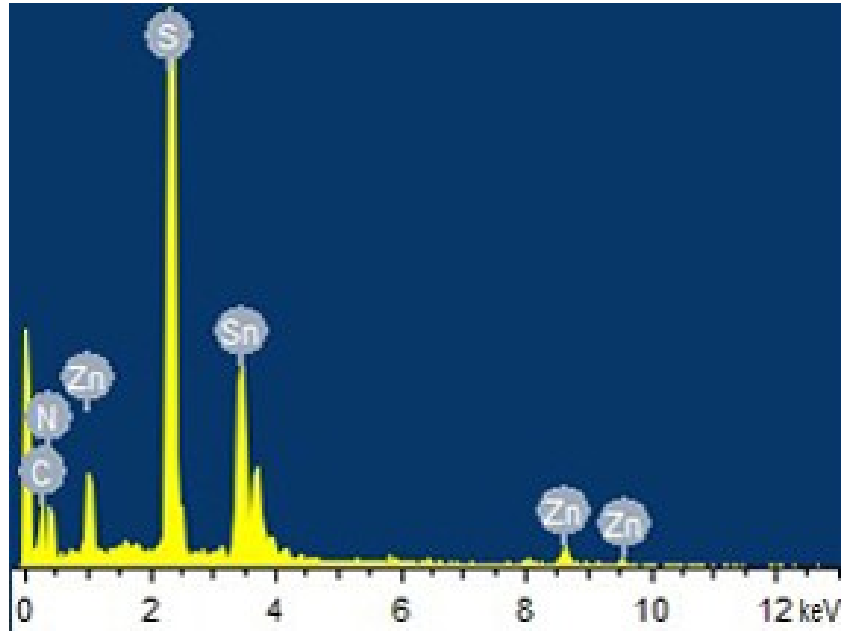

Fig. S7 The EDS plot of SnS-Zn.

### Section S6: Proton conduction

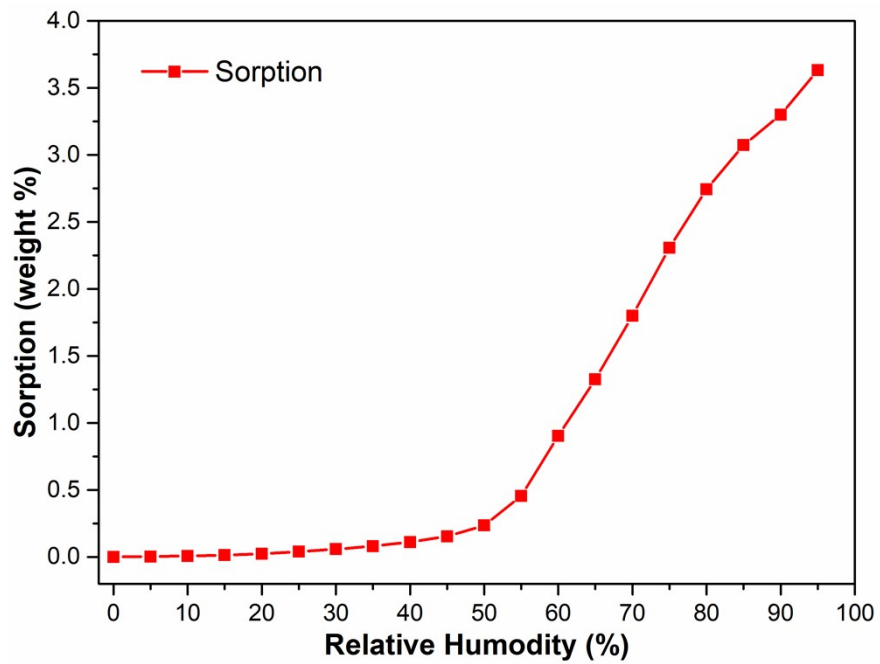

Fig. S8 Water vapor sorption isotherm of SnS-Fe.

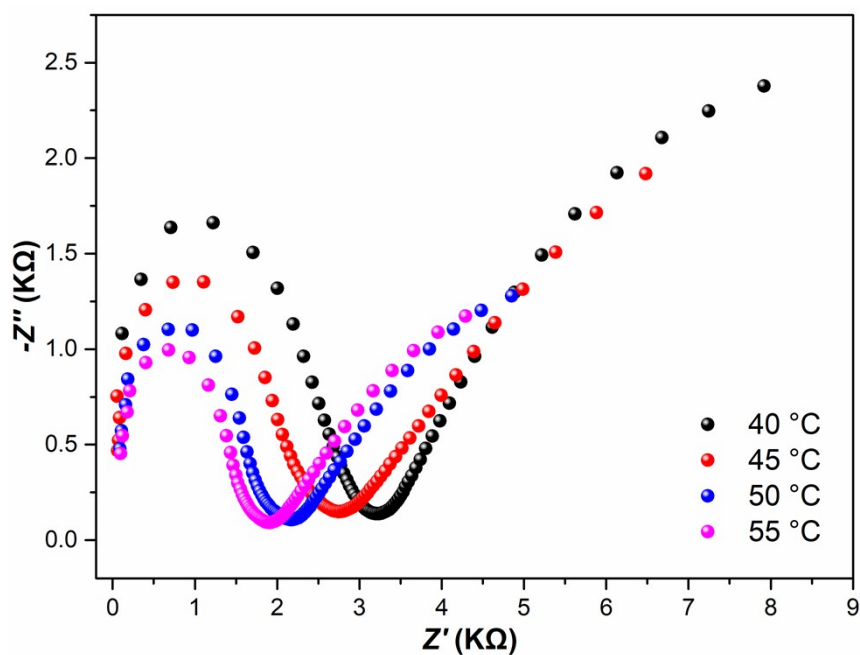

Fig. S9 The Nyquist plots of SnS-Fe at different temperatures under 75% rh.

### Section S7: Photodegradation

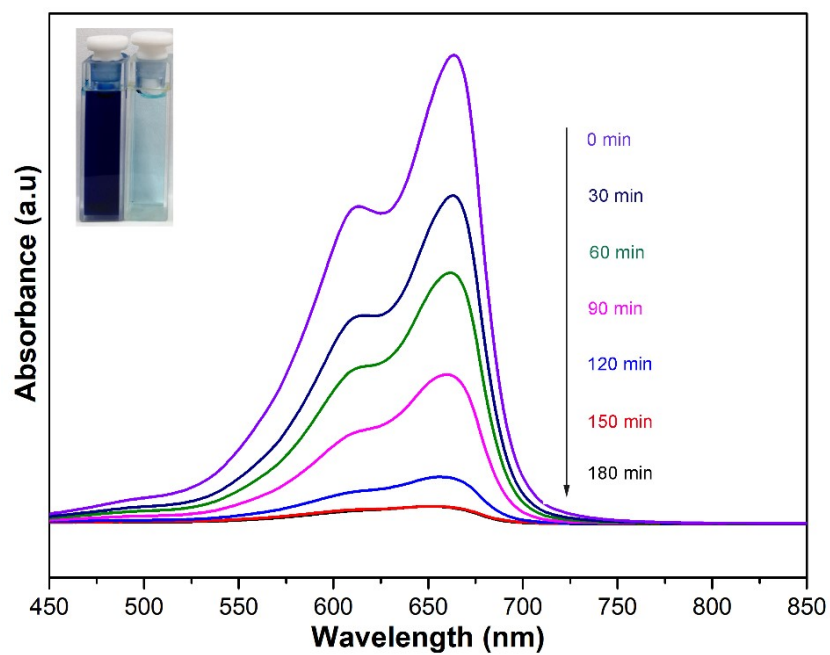

Fig. S10 The time-dependent UV-Vis absorption spectra of MB in the presence of SnS-Mn (photodegradation rate, 96.5%).

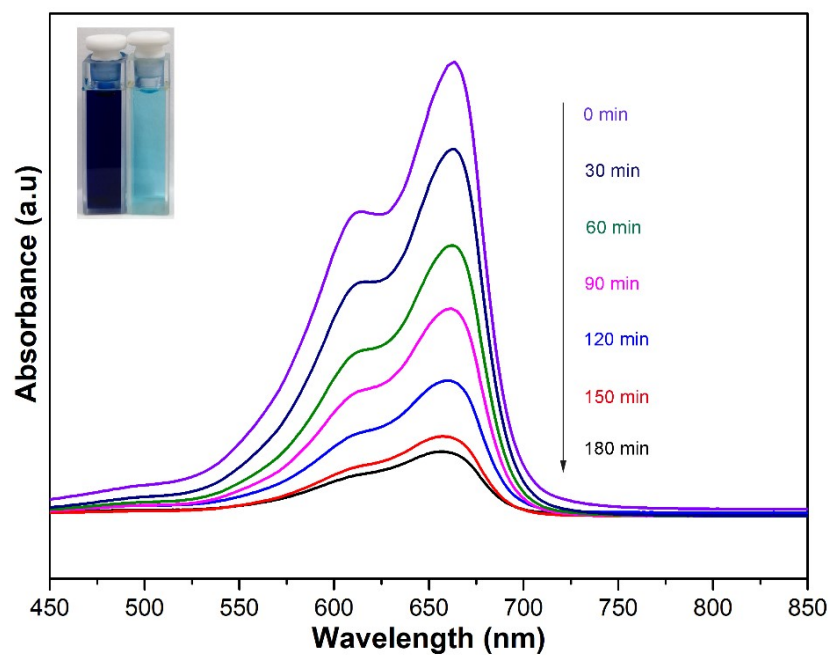

**Fig. S11** The time-dependent UV-Vis absorption spectra of MB in the presence of SnS-Zn (photodegradation rate, 86.4%).

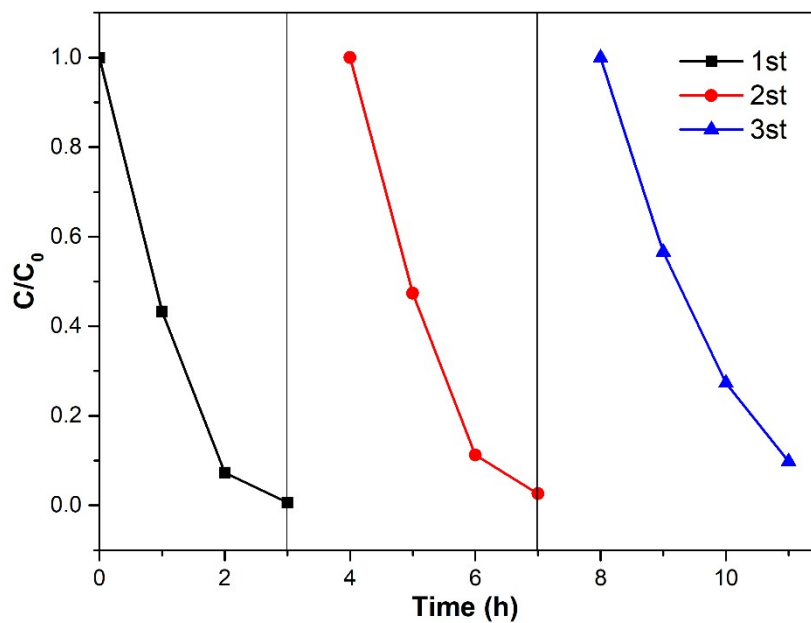

**Fig. S12** Photodegradation recycling experiment of SnS-Fe.



## Section S8: Powder X-ray Diffraction (PXRD)

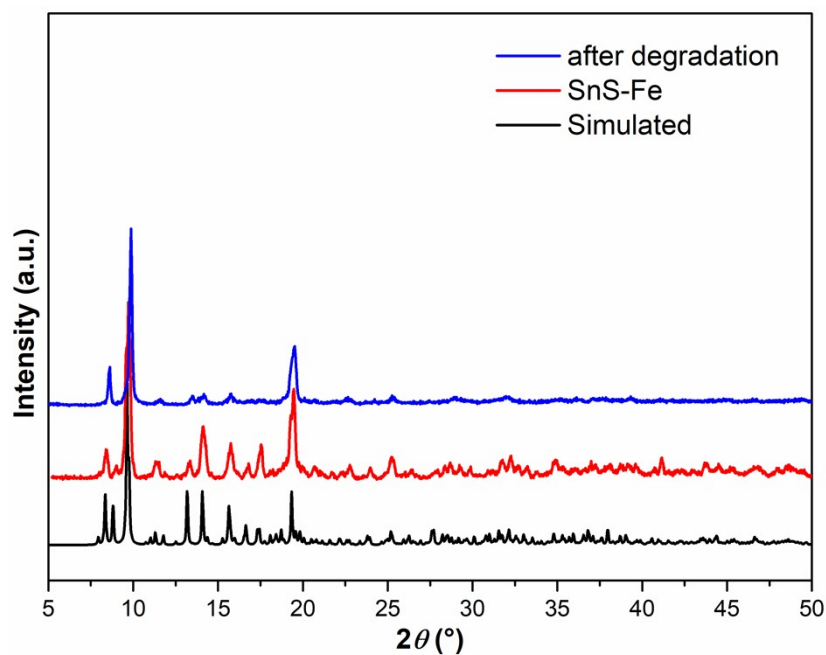

**Fig. S13** The simulated and the experimental PXRD patterns of **SnS-Fe** before and after photodegradation experiment.

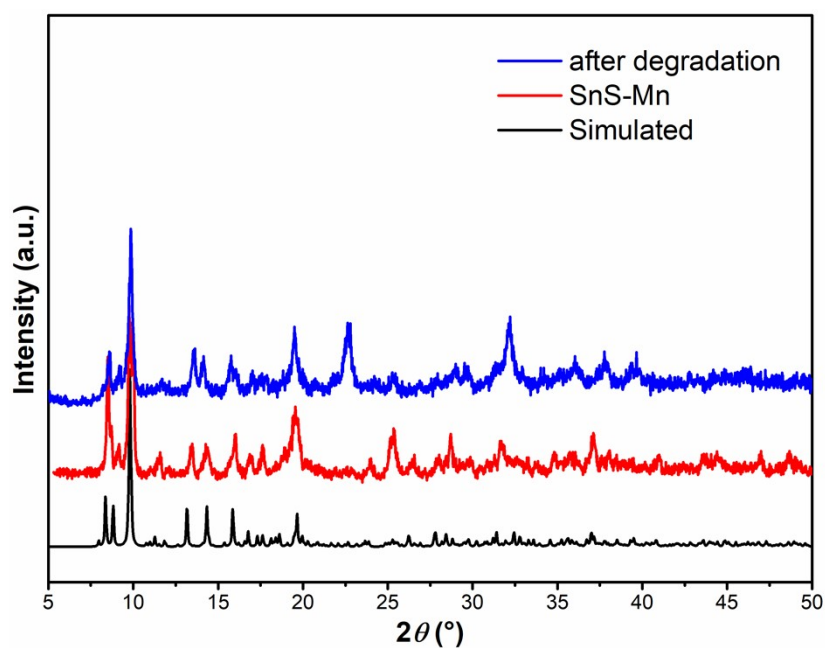

**Fig. S14** The simulated and the experimental PXRD patterns of **SnS-Mn** before and after photodegradation experiment.

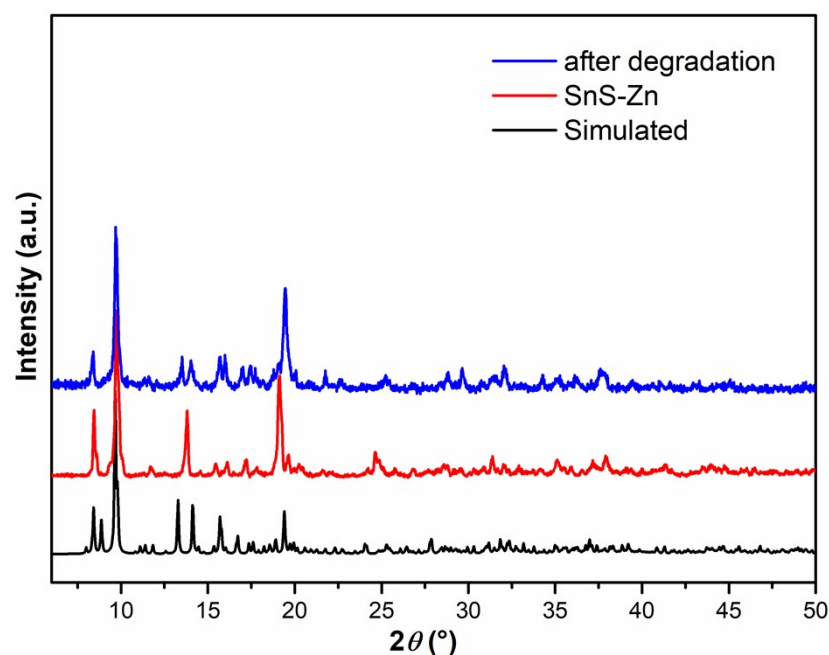

**Fig. S15** The simulated and the experimental PXRD patterns of **SnS-Zn** before and after photodegradation experiment.

### Section S9: X-ray photoelectron spectroscopy (XPS)

XPS analysis was used to examine the chemical states of the elements in the sample. As shown in **Fig. S16a**, there are Sn, S, Fe, N, C and O species in the **SnS-Fe** both before and after MB photodegradation. Deconvolution of the Fe 2p region (before photodegradation, **Fig. S16b**) by peak fitting showed four main peaks at 714.83, 711.30, 709.61 and 708.15 eV, assigned to  $\text{Fe}^{3+} 2p_{1/2}$ ,  $\text{Fe}^{2+} 2p_{1/2}$ ,  $\text{Fe}^{3+} 2p_{3/2}$  and  $\text{Fe}^{3+} 2p_{3/2}$ , respectively. After photocatalysis experiment, the peak positions of Fe 2p XPS slightly shifted to higher energy, while the peak area of  $\text{Fe}^{3+}$  become lower and the peak area of  $\text{Fe}^{2+}$  become higher after photodegradation, indicating that the electron and hole generated during the photocatalytic process transferred to  $\text{Fe}^{3+}$ -diethylenetriamine and methylene blue, respectively. The degradation of MB was accompanied by the partial reduction from  $\text{Fe}^{3+}$  to  $\text{Fe}^{2+}$  in the Fe-diethylenetriamine complexes. For the Sn 3d region, the slight shifts of the peak positions could be attributed to the interaction between the sample and the absorbed methylene blue. A broad peak of S 2p was found at 163.27 eV indicating the multiple chemical states of S, and the weakening of its signal can be attributed to the partial photocorrosion of the surface chalcogenide species.

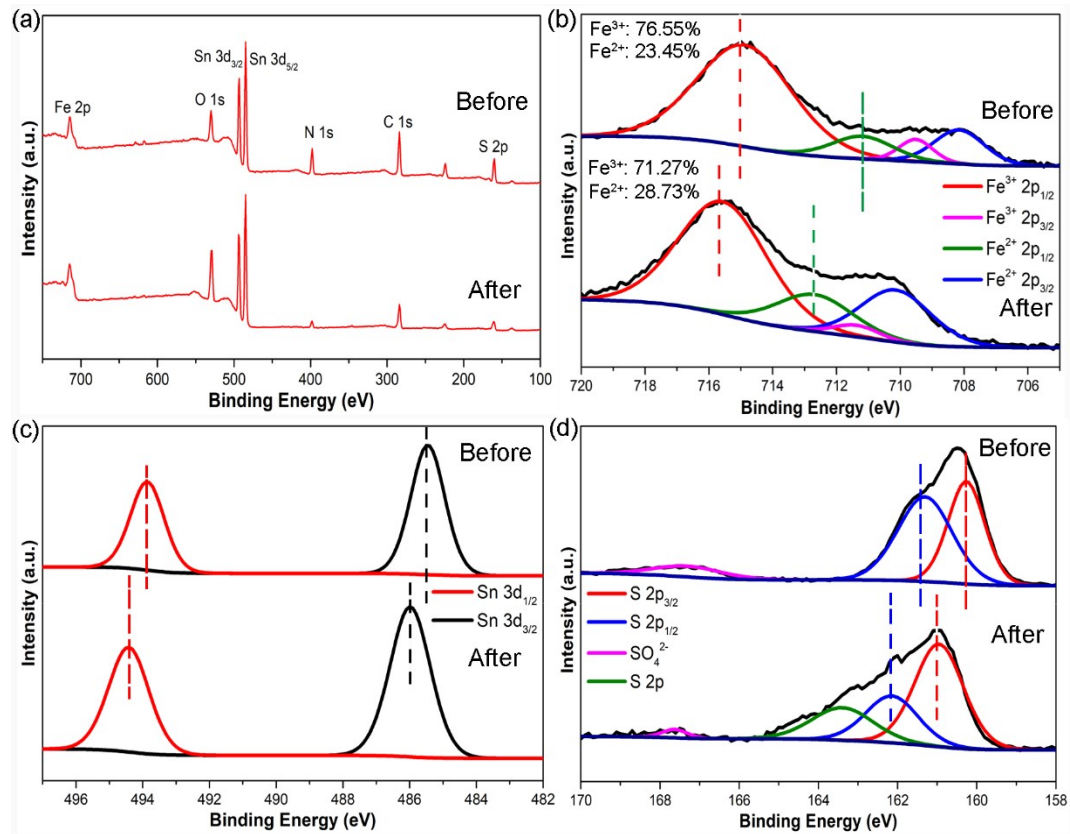

**Fig. S16** The XPS analysis of SnS-Fe before and after photodegradation of MB including XPS full spectrum (a), Fe 2p (b), Sn 3d (c) and S 2p (d), respectively.
